# Supplementary material for: Chromosome loci vary by juvenile myoclonic epilepsy subsyndromes: linkage and haplotype analysis applied to epilepsy and EEG 3.5–6.0 Hz polyspike waves
Source: PubMed Central journal article supplement (PMC4799870; doi:10.1002/mgg3.195), 2016-01-23

Supplementary Figure S4. SNP Marker Information and LOD-Score on Chr13 (Pedigree 2)

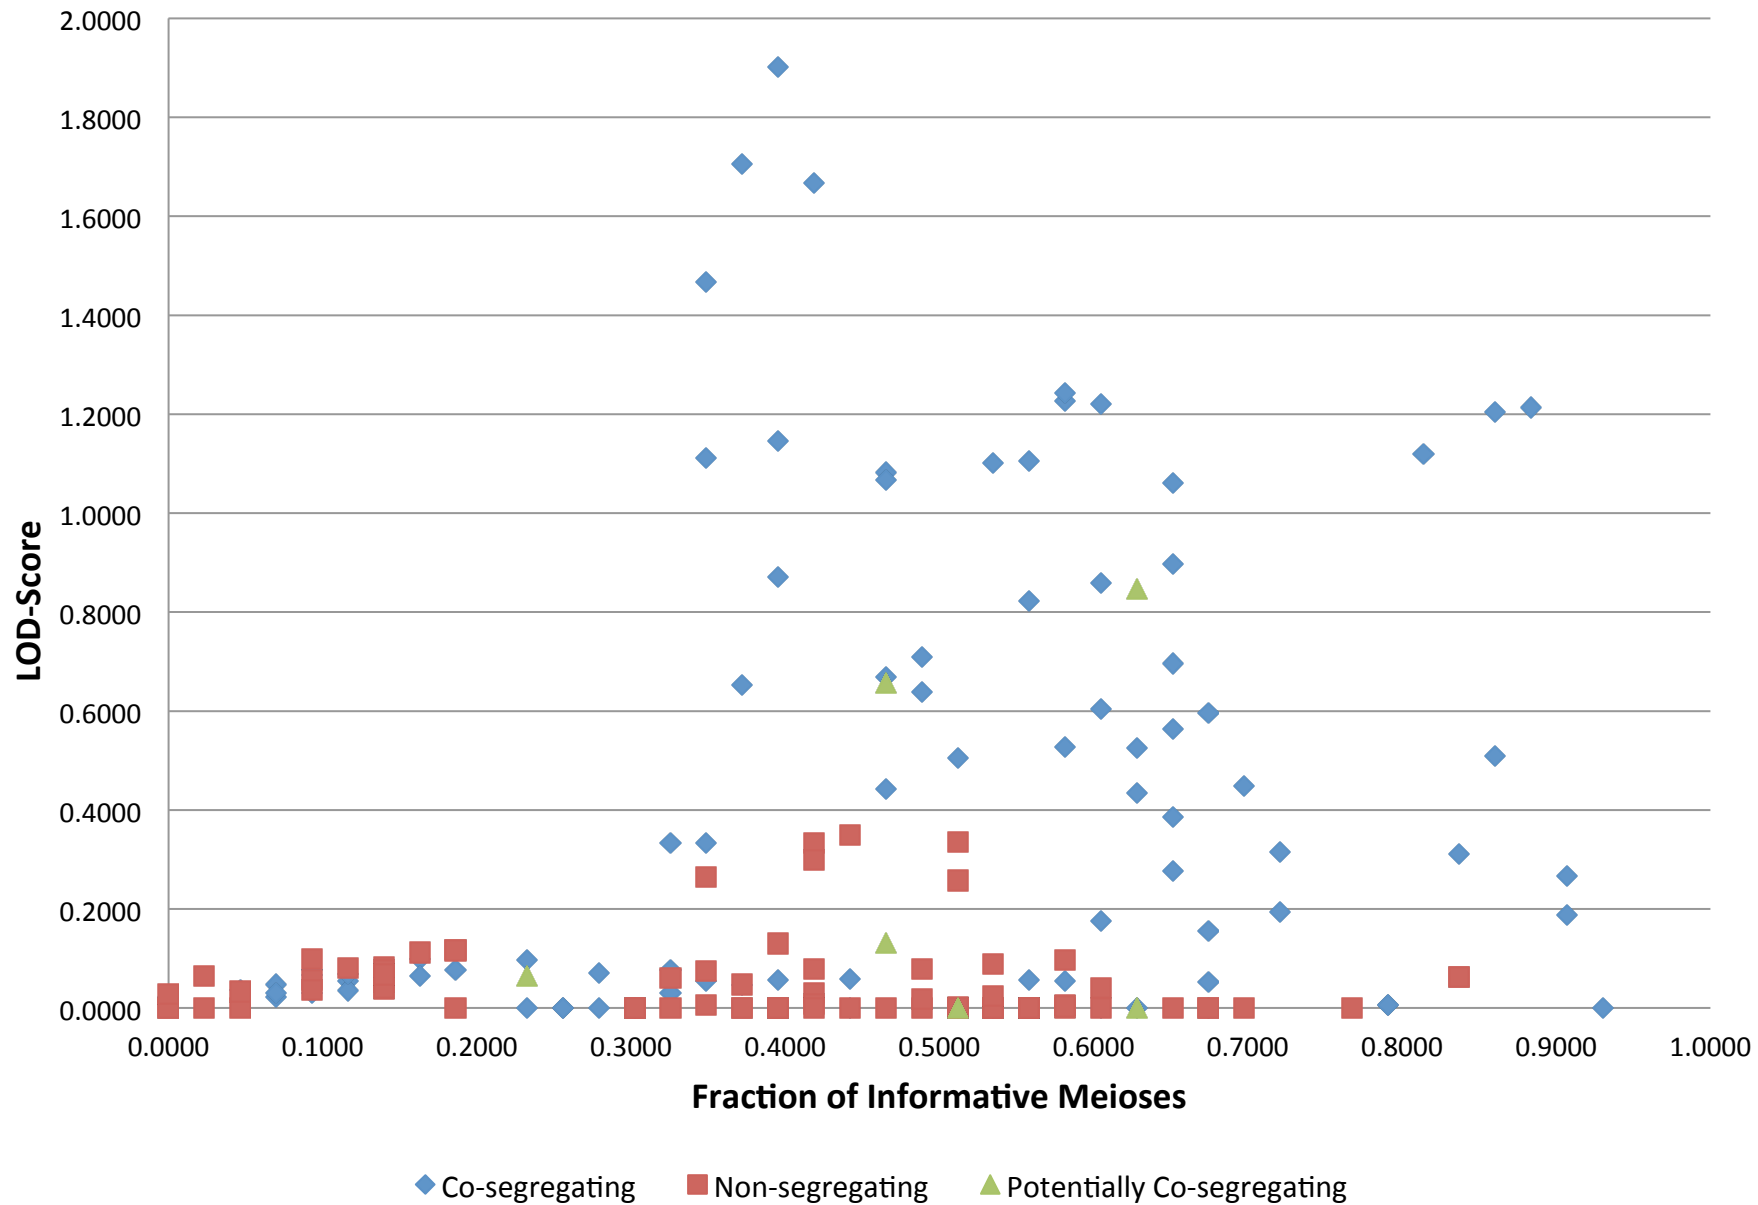

Supplement: MGG3-4-197-s004.pdf [file MGG3-4-197-s004.pdf]
